# Supplementary material for: Synthesis and molecular recognition studies of pyrrole sulfonamides
Source: Royal Society of Chemistry journal article supplement (doi:10.1039/b911985j), 2009-01-01
Supplement: b911985j.pdf [file b911985j.pdf]

## **Synthesis and Molecular Recognition Studies of Pyrrole Sulfonamides**

Michael T. Huggins\*, Tyler Butler, Jacob Hunt, and Patrick Barber

Department of Chemistry, University of West Florida, Pensacola, FL USA

|                                                      |       |           |
|------------------------------------------------------|-------|-----------|
| <b>General Methods</b>                               | ..... | <b>S2</b> |
| <b><sup>1</sup>H-NMR Host-Guest Titration Method</b> | ..... | <b>S2</b> |
| <b>Molecular Modeling Studies</b>                    | ..... | <b>S2</b> |
| <b>Synthetic Procedures</b>                          | ..... | <b>S3</b> |
| <b>Titration Data</b>                                | ..... | <b>S6</b> |

**General Methods:** Nuclear magnetic resonance (NMR) spectra were measured in CDCl<sub>3</sub> with tetramethylsilane (TMS) as internal reference standard at 300 MHz on a Varian MercuryPlus. Chemical shifts are reported in  $\delta$  (ppm) referenced to TMS. CDCl<sub>3</sub> was obtained from Cambridge Isotope Labs, and stored over CaH<sub>2</sub> to remove water and HCl. The solvent was filtered immediately prior to use. The reported melting points are uncorrected. Ethyl 3,4-dimethylpyrrole-2-carboxylate was prepared via standard methods. All other solvents and materials were purchased from common sources (Fisher, Acros or Aldrich) and used as received. Radial chromatography was carried out on Merck Silica Gel PF<sub>254</sub> with gypsum preparative layer grade, using a Chromatotron (Harrison Research, Inc., Palo Alto, CA).

**<sup>1</sup>H-NMR Host-Guest Titration Method:** Host:guest titrations were performed using <sup>1</sup>H-NMR spectroscopy. A 0.02 M stock solution of the respective pyrrole sulfonamides **1-4** was prepared in deuteriochloroform. Guest solutions ranged in concentration from 0.08M to 0.35M dissolved in 0.02M respective pyrrole sulfonamides **1-4** stock solution. A standard addition titration was performed with aliquots of guest solutions ranging from 15mL to 100mL added directly to stock solution in the NMR tube, and the <sup>1</sup>H-NMR spectra measured in order to track the change in chemical shift of the pyrrole and sulfonamide N-H protons until such time as the saturation point was reached. The reported K<sub>a</sub> values are the average calculated from both the sulfonamide and pyrrole NHs from multiple titrations (2-4 total). Errors are estimated to be no larger than 10%. All anions used were in their tetrabutylammonium salt form. All analysis resulted in R<sup>2</sup> values of 0.98 or better.

**Molecular Modeling Studies:** All molecular mechanics calculations were performed using Materials Studio, c4.1.0.0; Accelrys Software Inc.: 2006; forcefield – Dreiding; charges – Gasteiger; Electrostatics & van der Waals – atom based.

### **Synthetic Procedures**

**5-Carboethoxy-3,4-dimethyl-1*H*-pyrrole-2-sulfonyl chloride (6):** To a 100 mL RBF, pyrrole **5** (30 mmol) was added, and the solid material was cooled in an ice bath. Chlorosulfonic acid (25 mL) was added, and the solution was heated to 60°C. (Note: It is important for the reaction temperature to never exceed 65°C due to excessive decomposition and substantially lower yields.) The reaction was heated for ~10 minutes (no longer than 15 min). After heating, the resulting solution was added to a beaker of 150 g of crushed ice dropwise, carefully and quickly. (Caution: The excess chlorosulfonic acid decomposes vigorously!) The solid precipitate **6**, was collected by vacuum filtration. The crude product was used in the next step without further purification or characterization due to the hydrolysis of the sulfonyl chloride.

**Preparation of mono-sulfonamides:** Sulfonyl chloride **6** and 100 ml of methylene chloride were placed in a 250 mL RBF, and the desired amine (92 mmol) was added in one portion. After stirring for 24 hours at room temperature, the resulting solution was washed with saturated aqueous NaHCO<sub>3</sub> (2 x 100 mL), water (2 x 100 mL), and 10% aqueous HCl (2 x 100 mL). The organic solution was dried over anhydrous sodium sulfate, and the solvent removed by rotovap to give the desired crude product. The crude product was purified by recrystallization from CH<sub>2</sub>Cl<sub>2</sub>/hexanes followed by radial chromatography (CH<sub>2</sub>Cl<sub>2</sub>/methanol) to provide pure product.

**Preparation of Di-sulfonamides:** Sulfonyl chloride **6** and 60 ml of methylene chloride were placed in a 250 mL RBF, and the desired amine (11 mmol) was added in one portion. After stirring for 24 hours at room temperature, the resulting solution was washed with saturated aqueous NaHCO<sub>3</sub> (2 x 60 mL), water (2 x 60 mL), and 10% aqueous HCl (2 x 60 mL). The organic solution was dried over anhydrous sodium sulfate, and the solvent removed by rotovap to give the desired crude product. The crude product was purified by recrystallization from CH<sub>2</sub>Cl<sub>2</sub>/hexane followed by radial chromatography (CH<sub>2</sub>Cl<sub>2</sub>/hexane) to provide pure product. The di-sulfonamide was purified by recrystallization from methanol and water for **3**, and CH<sub>2</sub>Cl<sub>2</sub>/hexanes for **4**.

**5-Carboethoxy-2-phenylaminosulfonyl-3,4-dimethyl-1H-pyrrole(1):** Yield = 30%; It had a mp of 154-156°C; <sup>13</sup>C-NMR (75 MHz, CDCl<sub>3</sub>) δ 8.96, 10.14, 14.26, 60.96, 121.62, 122.53, 124.92 125.34, 126.00, 127.11, 129.29, 135.67, 160.99 ppm; <sup>1</sup>H-NMR (300 MHz, CDCl<sub>3</sub>) δ 1.34 (t, 3 H, 6.0H z), 1.94 (s, 3 H), 2.17 (s, 3H), 4.31 (q, 2 H, 6.0 Hz), 7.17 (m, 5 H), 9.55 (bs, 1 H) ppm; IR (KBr) 1354, 1593, 1658, 2934, 2978, 3210, 3429 cm<sup>-1</sup>; MS (EI+) (base peak) m/z; and HR-MS (EI+) C<sub>15</sub>H<sub>18</sub>N<sub>2</sub>O<sub>4</sub>S<sub>1</sub> Calc'd 322.0987 amu; found 322.0987 amu.

**5-Carboethoxy-2-butylaminosulfonyl-3,4-dimethyl-1H-pyrrole(2):** Yield = 57%; It had a mp of 63-66°C; <sup>13</sup>C-NMR (75 MHz, CDCl<sub>3</sub>) δ 9.46, 10.41, 13.75, 14.58, 19.91, 31.62, 42.85, 60.98, 121.34, 123.82, 126.74, 127.44 161.24 ppm; <sup>1</sup>H-NMR (300 MHz, CDCl<sub>3</sub>) δ 0.83 (t, 3 H, 7.2 Hz), 1.34 (m, 7 H), 2.17 (s, 3 H), 2.23 (s, 3 H), 2.90 (q, 2 H, 6.9 Hz), 4.31 (q, 2 H, 7.2 Hz), 5.36 (t, 1 H, 6.0 Hz), 9.69 (bs, 1H) ppm; IR (KBr) 901, 1239, 1317, 1723, 2958, 3286 cm<sup>-1</sup>; MS (EI+) (base peak) m/z; and HR-MS (EI+) C<sub>13</sub>H<sub>22</sub>N<sub>2</sub>O<sub>4</sub>S<sub>1</sub> Calc'd 302.1300 amu; found 302.1302 amu.

**N,N'-bis(5-Carboethoxy-3,4-dimethyl-1*H*-pyrrole-sulfonyl)-1,2-diaminoethane(3):** Yield = 57%; It had a mp decomposed at ~ 130°C; <sup>13</sup>C-NMR (75 MHz, DMSO) δ 9.11, 10.09, 14.39, 41.96, 60.31, 121.06, 122.90, 125.93, 127.54, 160.58 ppm; <sup>1</sup>H-NMR (300 MHz, D-Acetone) δ 1.31 (t, 3 H, 7.2 Hz), 2.08 (s, 3 H), 2.17 (s, 3 H), 2.81 (s, 2 H), 4.26 (q, 2 H, 6.9 Hz), 7.36 (bs, 1 H), 11.67 (bs, 1 H) ppm; IR (KBr) 595, 1240, 1689, 2930, 3203, 3320 cm<sup>-1</sup>; MS (EI+) (base peak) m/z; and HR-MS (EI+) C<sub>20</sub>H<sub>30</sub>N<sub>4</sub>O<sub>8</sub>S<sub>2</sub> Calc'd 518.1505 amu; found 518.1518 amu.

**N,N'-bis(5-Carboethoxy-3,4-dimethyl-1*H*-pyrrole-sulfonyl)-1,4-diaminobutane(4):** Yield = 35%; It had a mp decomposed at 124°C; <sup>13</sup>C-NMR (75 MHz, CDCl<sub>3</sub>) δ 9.51, 10.47, 14.58, 26.46, 42.42, 61.13, 121.56, 123.88, 126.54, 127.48, 161.32 ppm; <sup>1</sup>H-NMR (300 MHz, CDCl<sub>3</sub>) δ 1.39 (t, 3 H, 7.5 Hz), 1.48 (s, 2 H), 2.18 (s, 3 H), 2.24 (s, 3 H), 2.88 (s, 2 H), 4.34 (q, 2 H, 7.5 Hz), 6.74 (t, 1 H, 6.0 Hz), 10.53 (bs, 1 H) ppm; IR (KBr) 599, 1242, 1699, 2934, 3271 cm<sup>-1</sup>; MS (EI+) (base peak) m/z; and HR-MS (EI+) C<sub>22</sub>H<sub>34</sub>N<sub>4</sub>O<sub>8</sub>S<sub>2</sub> Calc'd 546.1818 amu; found 546.1813 amu.

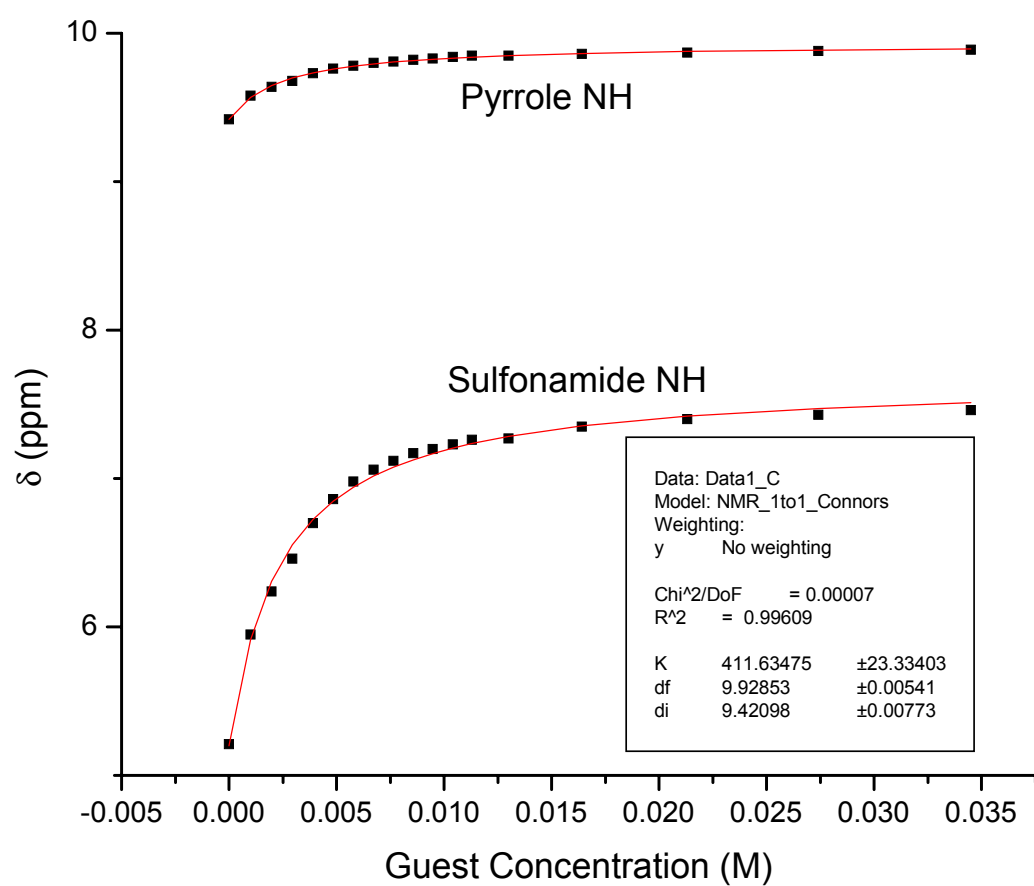

Figure1. Titration curves for disulfonamide **3** with TBA Br<sup>-</sup> in CDCl<sub>3</sub> at 25°C.

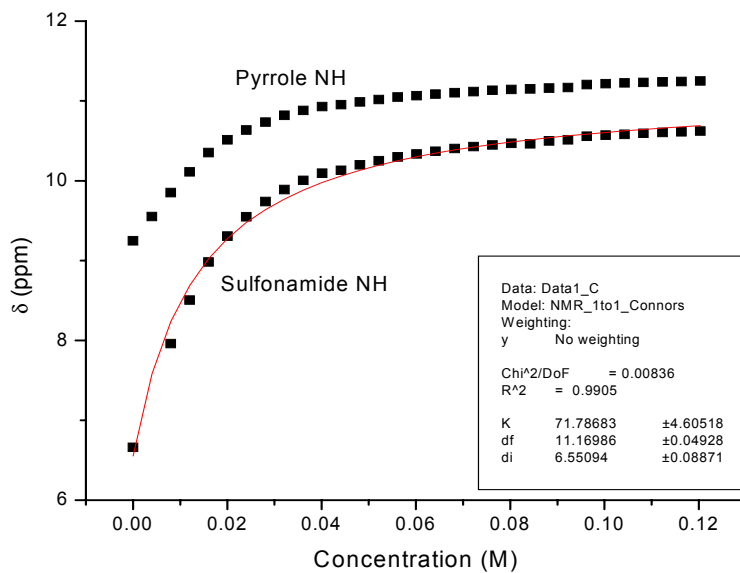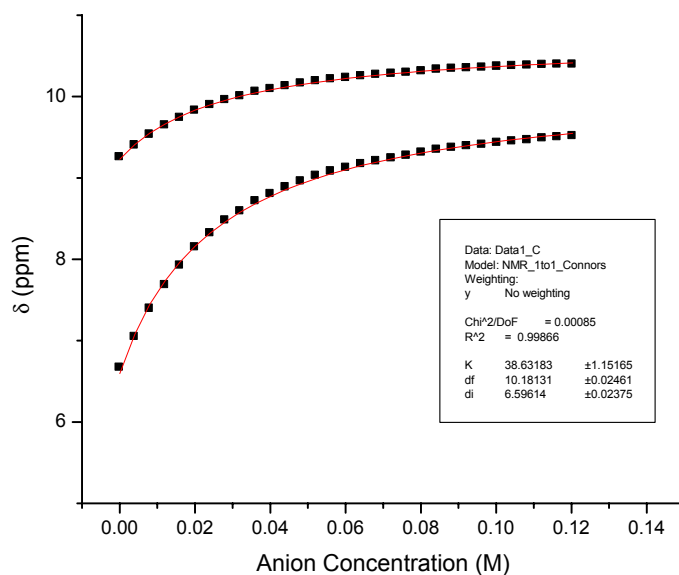

Figure 1. Titration curves for sulfonamide **1** with TBA Cl<sup>-</sup> in CDCl<sub>3</sub> at 25°C.

Figure 2. Titration curves for sulfonamide **1** with TBA Br<sup>-</sup> in CDCl<sub>3</sub> at 25°C.

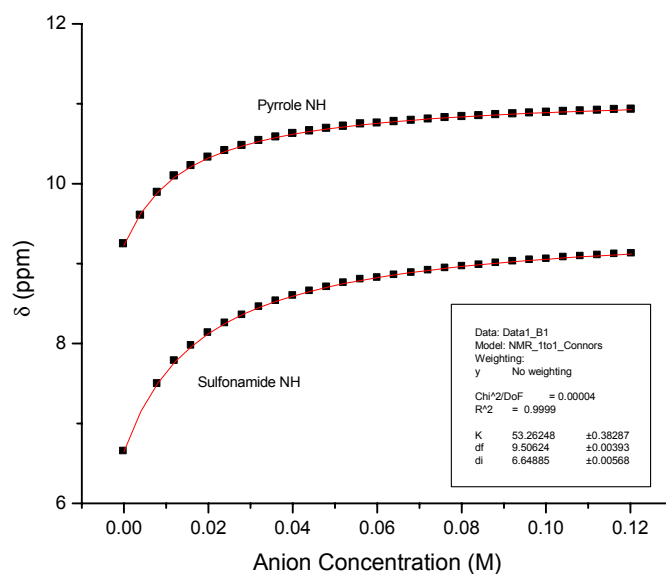

Figure 3. Titration curves for sulfonamide **1** with TBA hydrogen sulfate in CDCl<sub>3</sub> at 25°C.

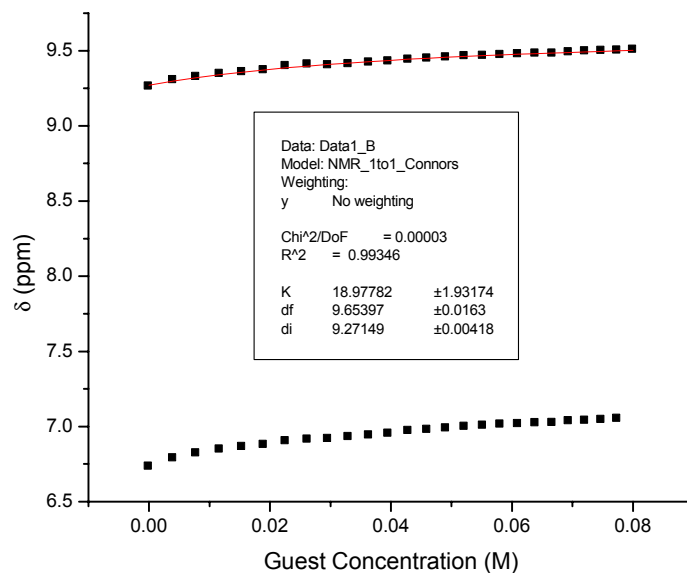

Figure 4. Titration curves for sulfonamide **1** with benzoic acid in CDCl<sub>3</sub> at 25°C.



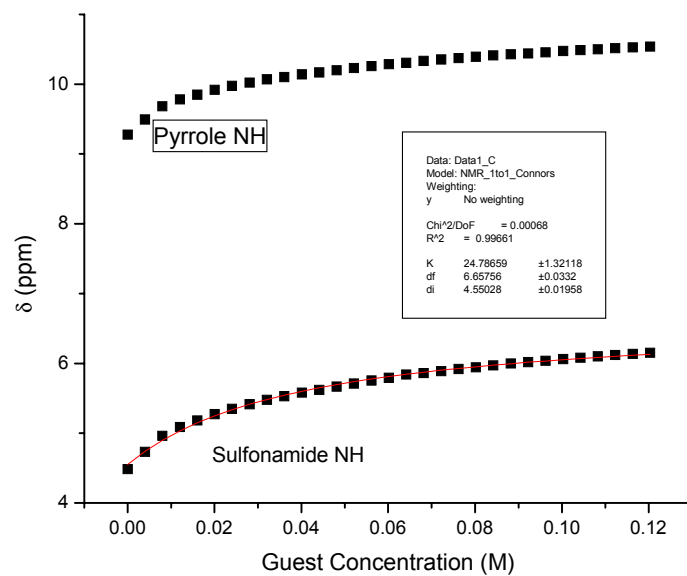

Figure 5. Titration curves for sulfonamide **2** with TBA HSO<sub>4</sub><sup>-</sup> in CDCl<sub>3</sub> at 25°C.

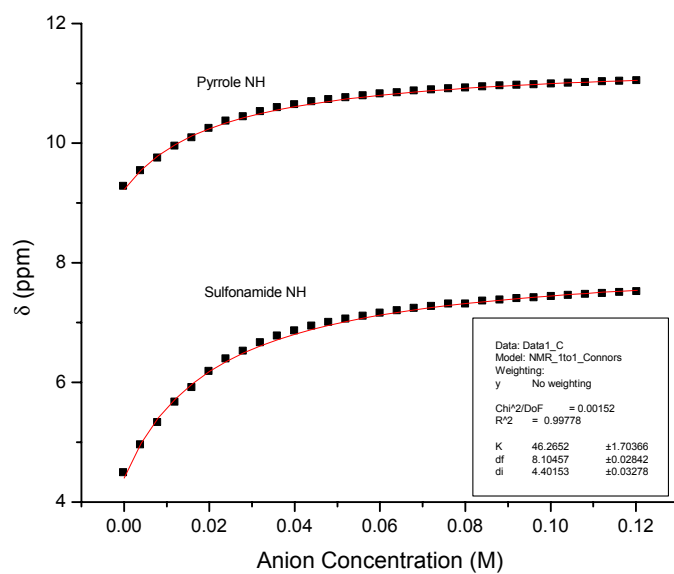

Figure 6. Titration curves for sulfonamide **2** with TBACl in CDCl<sub>3</sub> at 25°C.

Figure 7. Titration curves for sulfonamide **2** with TBA NO<sub>3</sub><sup>-</sup> in CDCl<sub>3</sub> at 25°C.

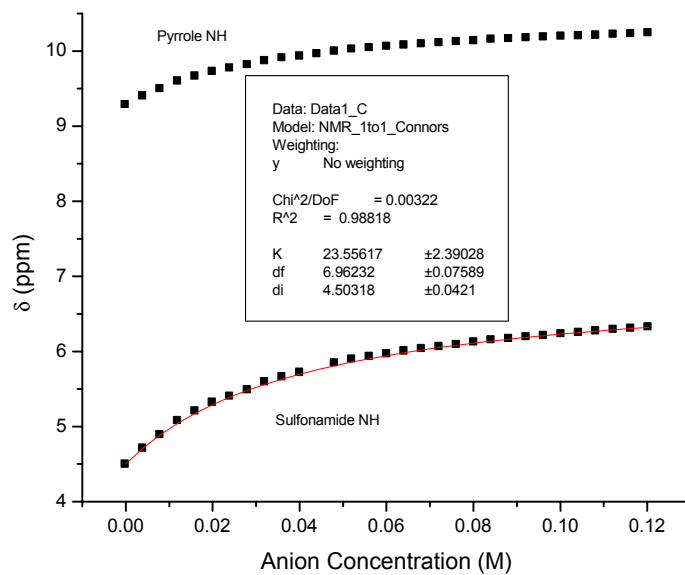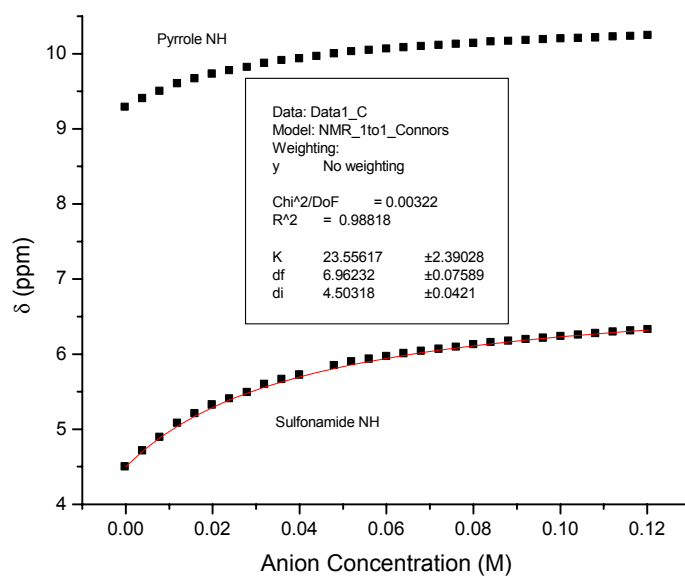

Figure 8. Titration curves for sulfonamide **2** with TBA Br<sup>-</sup> in CDCl<sub>3</sub> at 25°C.



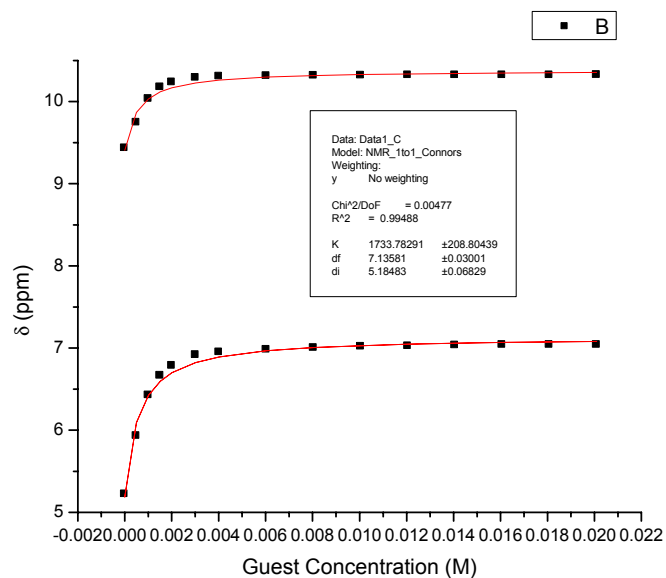

Figure 9. Titration curves for sulfonamide **3** with TBA  $\text{HSO}_4^-$  in  $\text{CDCl}_3$  at  $25^\circ\text{C}$ .

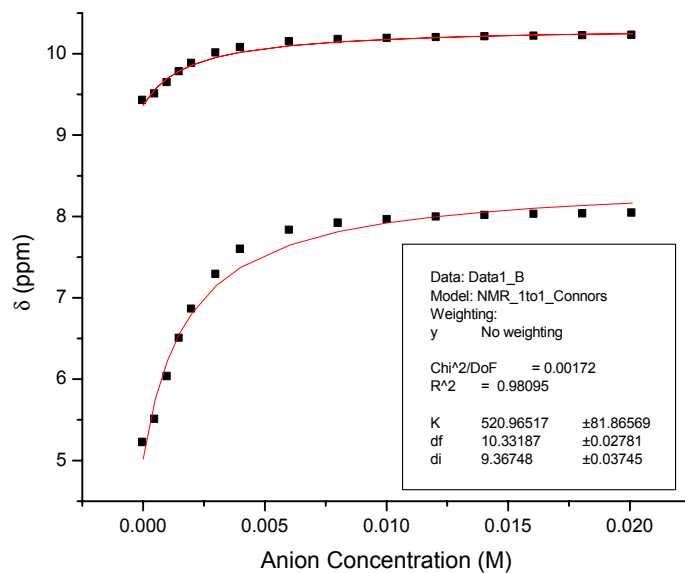

Figure 10. Titration curves for sulfonamide **3** with TBA  $\text{Cl}^-$  in  $\text{CDCl}_3$  at  $25^\circ\text{C}$ .

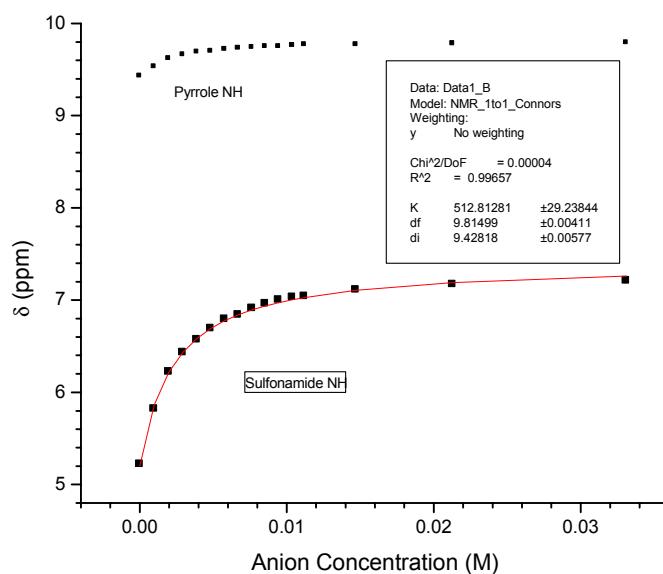

Figure 11. Titration curves for sulfonamide **3** with TBA NO<sub>3</sub><sup>-</sup> in CDCl<sub>3</sub> at 25°C.

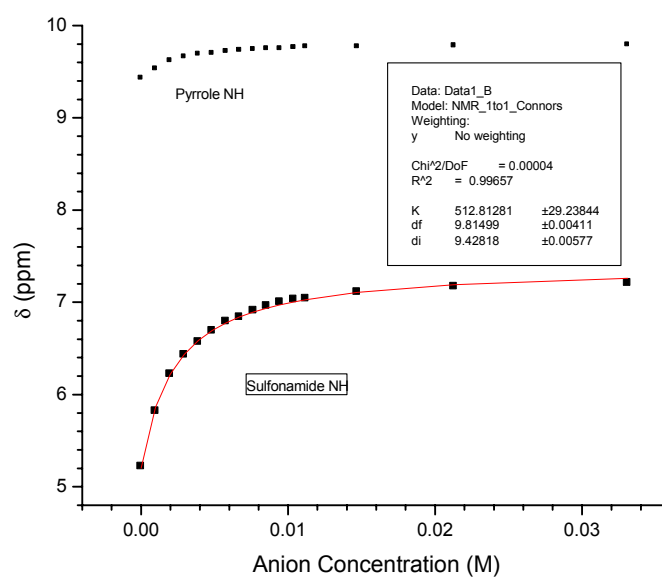

Figure 12. Titration curves for sulfonamide **3** with TBA Br<sup>-</sup> in CDCl<sub>3</sub> at 25°C.

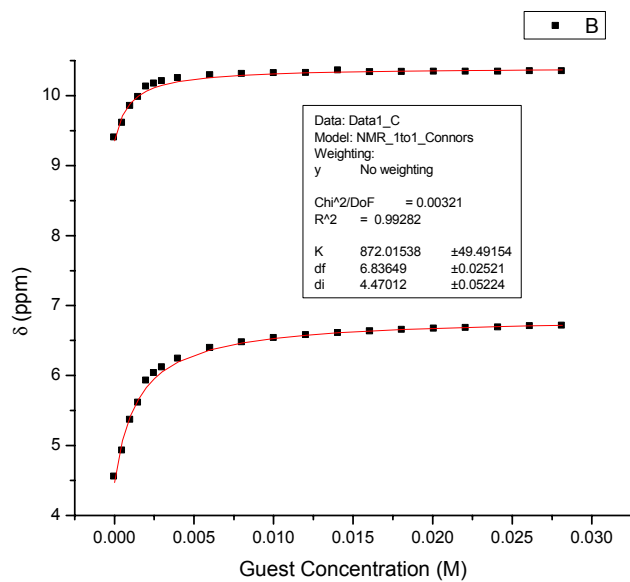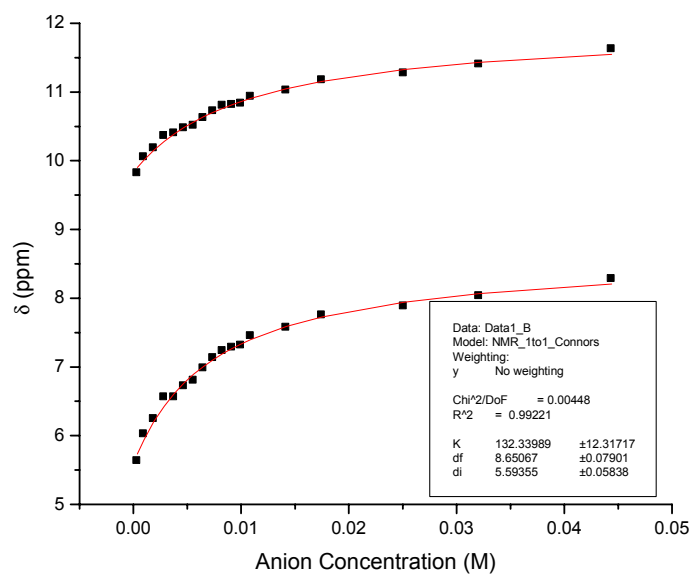

Figure 13. Titration curves for sulfonamide **4** with TBA HSO<sub>4</sub><sup>-</sup> in CDCl<sub>3</sub> at 25°C.

Figure 14. Titration curves for sulfonamide **4** with TBA Cl<sup>-</sup> in CDCl<sub>3</sub> at 25°C.

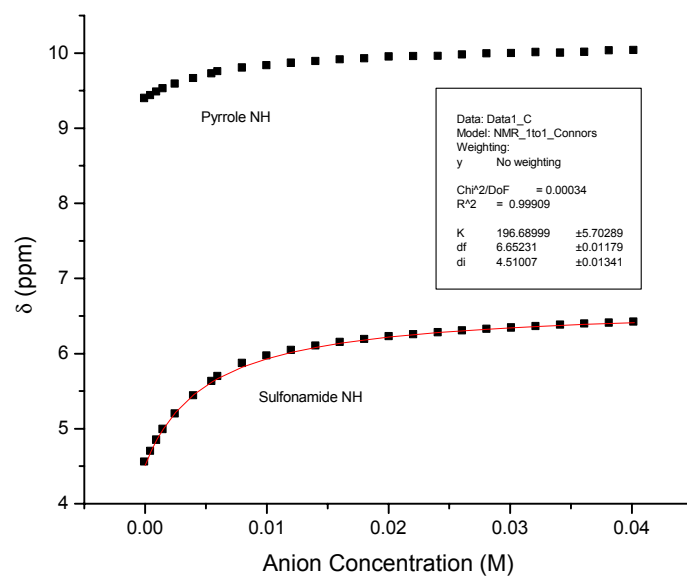

Figure 14. Titration curves for sulfonamide **4** with TBA NO<sub>3</sub><sup>-</sup> in CDCl<sub>3</sub> at 25°C .

Figure 14. Titration curves for sulfonamide **4** with TBA Br<sup>-</sup> in CDCl<sub>3</sub> at 25°C.



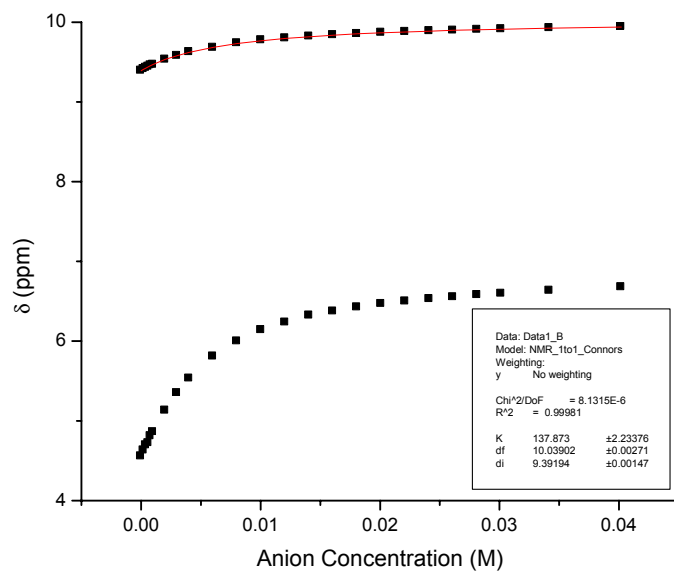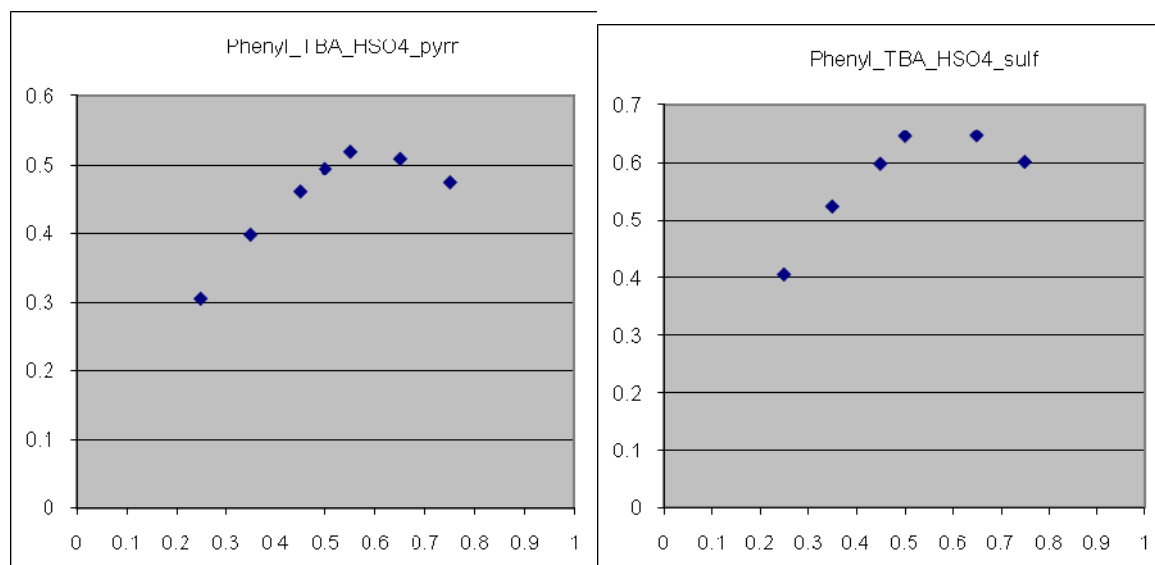

Figure 15. Job Plots for **1** with TBA HSO<sub>4</sub><sup>-</sup> in CDCl<sub>3</sub> at 25°.

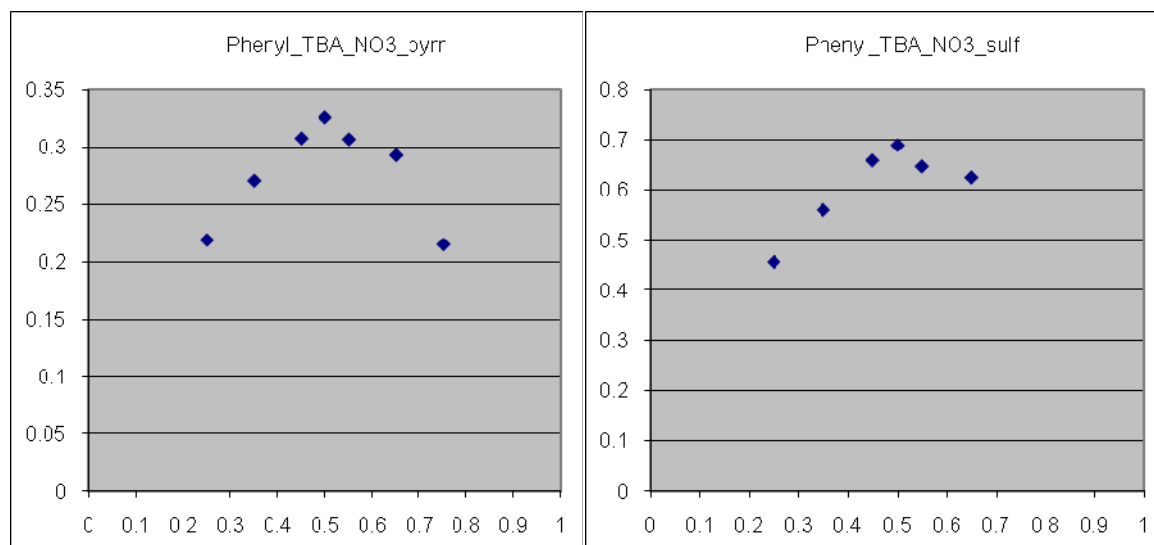

Figure 16. Job Plots for **1** with TBA NO<sub>3</sub><sup>-</sup> in CDCl<sub>3</sub> at 25°.

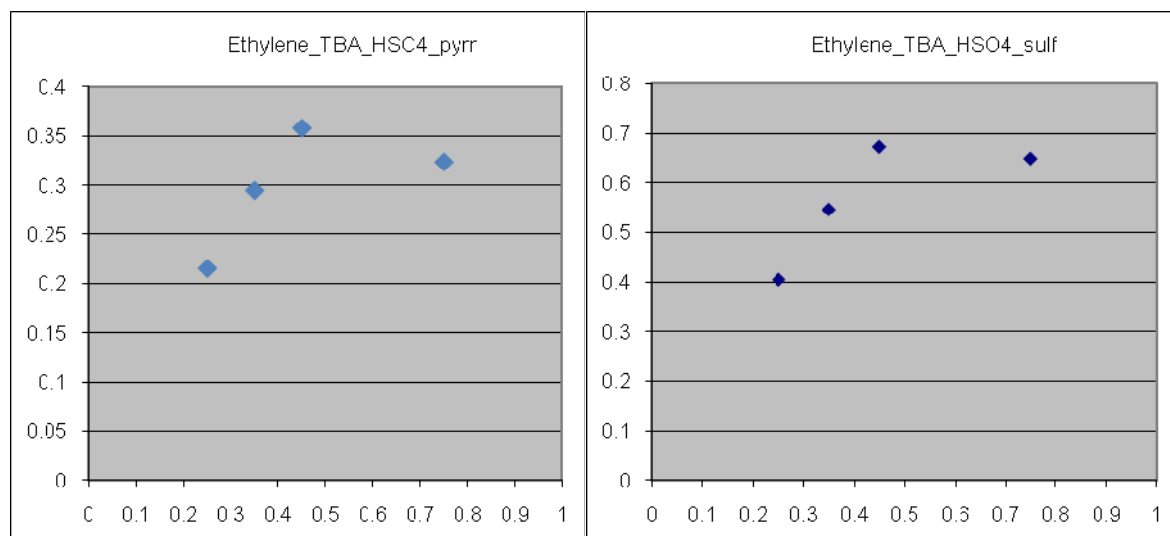

Figure 17. Job Plots for **3** with TBA  $\text{HSO}_4^-$  in  $\text{CDCl}_3$  at  $25^\circ$ .
